# Supplementary material for: Honey: An Advanced Antimicrobial and Wound Healing Biomaterial for Tissue Engineering Applications
Source: MDPI journal article supplement (doi:10.3390/pharmaceutics14081663), 2022-08-10
Supplement: s1 [file s1]

# Honey: An Advanced Antimicrobial and Wound Healing Biomaterial for Tissue Engineering Applications

Joel Yupanqui Mieles, Cian Vyas, Enes Aslan, Gavin Humphreys, Carl Diver and Paulo Bartolo

## Supplementary Tables

**Table S1.** Commercially available manuka honey and MGO levels available.

| Manufacturer/Brand               | MGO [mg/kg]                                             | Reference |
|----------------------------------|---------------------------------------------------------|-----------|
| Comvita*                         | 83+ to 829+ (UMF® 5+ to 20+)                            | [1]       |
| Egmont Honey*                    | 83+ to 829+ (UMF® 5+ to 20+) Limited editions of UMF27+ | [2]       |
| Manuka Doctor                    | 30+ to 940+                                             | [3]       |
| Manuka Health                    | 115+ to 950+                                            | [4]       |
| Manuka Pharm                     | 40+ to 340+                                             | [5]       |
| New Zealand Manuka Group/Melora* | 83+ to 829+ (UMF® 5+ to 20+)                            | [6]       |
| Optima/ Pure Gold                | 85+ to 525+                                             | [7]       |

\* Manufacturers with UMF/dual grading system. UMF= Unique Manuka Factor – Grading system directly proportional to the amount of MGO, Leptosperin, dihydroxyacetone (DHA), and 5-hydroxymethylfurfural (HMF).

**Table S2.** Gram-positive and Gram-negative bacterial strains inhibited by different honey types, their corresponding minimum inhibitory concentration (MIC) values (lowest concentration of a chemical compound that prevents visible growth of a bacterium) and suggested mechanism of action.

| GRAM-POSITIVE BACTERIA           |                   |                                                                     |             |             |                                                                   |      |
|----------------------------------|-------------------|---------------------------------------------------------------------|-------------|-------------|-------------------------------------------------------------------|------|
| Strain inhibited                 | Honey Type        | Honey/plant source (species)                                        | Origin      | MIC (% v/v) | Mechanism of action                                               | Ref. |
| Coagulase-negative Staphylococci | Manuka (MGO 263+) | <i>Leptospermum scoparium</i>                                       | New Zealand | 9.1*        | Methylglyoxal                                                     | [8]  |
|                                  | Tualang           | <i>Koompassia excelsa</i> , Multifloral by <i>Apis dorsata</i> bees | Malaysia    | 7.2*        | Hydrogen peroxide                                                 | [8]  |
| <i>Enterococcus faecalis</i>     |                   |                                                                     |             |             |                                                                   |      |
| vancomycin-sensitive             | Artificial        | -                                                                   | -           | 29.7        | Osmolarity and acidity                                            | [9]  |
|                                  | Chestnut          | <i>Aesculus</i>                                                     | Italy       | 25          | Osmolarity, acidity and hydrogen peroxide                         | [10] |
|                                  | Honeydew          | ( <i>Abies Alba</i> )                                               | Poland      | 15          | High total amount of polyphenolic compounds (flavonoids)          | [11] |
|                                  | Lime tree         | <i>Tilia</i>                                                        | Italy       | 50          | Osmolarity, acidity and hydrogen peroxide                         | [10] |
|                                  | Manuka (MGO 250+) | <i>Leptospermum scoparium</i>                                       | New Zealand | 15          | Methylglyoxal, high amount of polyphenolic compounds (flavonoids) | [11] |
|                                  | Manuka (MGO 696+) | <i>Leptospermum scoparium</i>                                       | New Zealand | 4.9         | Methylglyoxal                                                     | [9]  |
|                                  | Multiflora        | Pasture                                                             | New Zealand | 9.7         | Hydrogen peroxide                                                 | [9]  |
|                                  | Rhododendron      | <i>Rhododendron</i>                                                 | Italy       | 25          | Osmolarity, acidity and hydrogen peroxide                         | [10] |
| <i>Enterococcus faecalis</i>     |                   |                                                                     |             |             |                                                                   |      |
| vancomycin-resistant             | Artificial        | -                                                                   | -           | 29.5        | Osmolarity and acidity                                            | [9]  |
|                                  | Manuka (MGO 696+) | <i>Leptospermum scoparium</i>                                       | New Zealand | 3.8         | Methylglyoxal                                                     | [9]  |
|                                  | Multiflora        | Pasture                                                             | New Zealand | 5.6         | Hydrogen peroxide                                                 | [9]  |

|                                                        |                        |                                    |             |      |                                                                   |      |
|--------------------------------------------------------|------------------------|------------------------------------|-------------|------|-------------------------------------------------------------------|------|
| <i>Enterococcus raffinosus</i><br>vancomycin-resistant | Artificial honey       | -                                  | -           | 29   | Osmolarity and acidity                                            | [9]  |
|                                                        | Manuka (MGO 696+)      | <i>Leptospermum scoparium</i>      | New Zealand | 4.9  | Methylglyoxal                                                     | [9]  |
|                                                        | Multiflora             | Pasture                            | New Zealand | 9    | Hydrogen peroxide                                                 | [9]  |
| <i>Staphylococcus aureus</i> (MSSA)                    | Agastache              | <i>Agastache Rugosa</i>            | Australia   | 6.3  | Methyl syringate, phenyllactic acid and hydrogen peroxide         | [12] |
|                                                        | Buckwheat              | <i>Fagopyrum esculentum</i> Moench | Poland      | 3.1  | Hydrogen peroxide, polyphenols and antioxidants                   | [13] |
|                                                        | Chestnut               | <i>Aesculus</i>                    | Italy       | 6.3  | Hydrogen peroxide, polyphenols and antioxidants                   | [13] |
|                                                        | Chestnut and pine      | <i>Castanea</i> and <i>Pinus</i>   | Greece      | 3.1  | Hydrogen peroxide and antibacterial proteinaceous compounds       | [14] |
|                                                        | Dandelium              | <i>Taraxacum</i>                   | Italy       | 25   | Osmolarity, acidity and hydrogen peroxide                         | [10] |
|                                                        | Honeydew               | <i>(Abies Alba)</i>                | Poland      | 3.1  | Hydrogen peroxide, polyphenols and antioxidants                   | [13] |
|                                                        | Jarra                  | <i>Eucalyptus marginata</i>        | Australia   | 12.5 | Hydrogen peroxide                                                 | [12] |
|                                                        | Jelly bush             | <i>Leptospermum polygalifolium</i> | Australia   | 12.5 | Methylglyoxal                                                     | [12] |
|                                                        | Lime tree              | <i>Tilia</i>                       | Poland      | 3.1  | Hydrogen peroxide, polyphenols and antioxidants                   | [13] |
|                                                        | Lime tree              | <i>Tilia</i>                       | Italy       | 25   | Osmolarity, acidity and hydrogen peroxide                         | [10] |
|                                                        | Madrones               | <i>Arbutus</i>                     | Greece      | 6.3  | Hydrogen peroxide                                                 | [14] |
|                                                        | Manuka (medical grade) | <i>Leptospermum scoparium</i>      | New Zealand | 3.1  | Methylglyoxal                                                     | [10] |
|                                                        | Manuka (MGO 250+)      | <i>Leptospermum scoparium</i>      | New Zealand | 20   | Methylglyoxal, high amount of polyphenolic compounds (flavonoids) | [11] |
|                                                        | Manuka (MGO 263+)      | <i>Leptospermum scoparium</i>      | New Zealand | 9.1* | Methylglyoxal                                                     | [8]  |

|                           |                                                                     |             |       |                                                                   |      |
|---------------------------|---------------------------------------------------------------------|-------------|-------|-------------------------------------------------------------------|------|
| Manuka (MGO 400+)         | <i>Leptospermum scoparium</i>                                       | New Zealand | 15    | Methylglyoxal, high amount of polyphenolic compounds (flavonoids) | [11] |
| Manuka (MGO 550+)         | <i>Leptospermum scoparium</i>                                       | New Zealand | 6.3   | Methylglyoxal                                                     | [14] |
| Manuka (MGO 971+)         | <i>Leptospermum scoparium</i>                                       | New Zealand | 6.3   | Methylglyoxal, phenyllactic acid and methyl syringate             | [12] |
| Multiflora                | -                                                                   | Poland      | 1.6   | Polyphenols and antioxidants                                      | [13] |
| Multiflora                | -                                                                   | Kazakhstan  | 3.1   | Hydrogen Peroxide, polyphenols and antioxidants                   | [13] |
| Multiflora                | -                                                                   | Italy       | 12.5  | Osmolarity, acidity and hydrogen peroxide                         | [10] |
| Multiflora                | Herbs                                                               | Greece      | 3.1   | Hydrogen peroxide                                                 | [14] |
| Multiflora (A. mellifera) | Multifloral native forest, by Africanized A. mellifera bees         | Brazil      | 10.6* | Phenolic content                                                  | [15] |
| Multiflora (T. angustula) | Typical native fores with B. dracunculifolia, by T. angustula bees  | Brazil      | 12.8* | Phenolic content                                                  | [15] |
| Pine                      | <i>Pinus</i>                                                        | Greece      | 3.1   | Hydrogen peroxide                                                 | [14] |
| Rhododendron              | <i>Rhododendron</i>                                                 | Italy       | 25    | Osmolarity, acidity and hydrogen peroxide                         | [10] |
| Sunflower                 | <i>Helianthus</i>                                                   | Greece      | 3.1   | Hydrogen Peroxide and antibacterial proteinaceous compounds       | [14] |
| Super manuka (MGO 400+)   | <i>Leptospermum polygalifolium</i><br><i>Leptospermum lanigerum</i> | Australia   | 12.5  | Phenyllactic acid, hydrogen peroxide and methyl syringate         | [12] |
| Tea tree                  | &<br><i>Leptospermum scoparium</i>                                  | Australia   | 6.3   | Hydrogen peroxide, phenyllactic acid and Methyl syringate         | [12] |
| Thyme                     | <i>Thymus</i><br><i>Koompassia excelsa</i> ,                        | Cyprus      | 6.3   | Hydrogen peroxide                                                 | [14] |
| Tualang                   | Multifloral by <i>Apis dorsata</i> bees                             | Malaysia    | 12.7* | Hydrogen peroxide                                                 | [8]  |

|                                                           |                                                               |             |       |                                                           |      |  |
|-----------------------------------------------------------|---------------------------------------------------------------|-------------|-------|-----------------------------------------------------------|------|--|
| <i>Staphylococcus aureus</i> Methicillin-resistant (MRSA) |                                                               |             |       |                                                           |      |  |
| Agastache                                                 | <i>Agastache Rugosa</i>                                       | Australia   | 9.1*  | Methyl syringate, phenyllactic acid and hydrogen peroxide | [12] |  |
| Artificial honey                                          | -                                                             | -           | >30   | Osmolarity and acidity                                    | [9]  |  |
| Chestnut                                                  | <i>Aesculus</i>                                               | Italy       | 25    | Osmolarity, acidity and hydrogen peroxide                 | [10] |  |
| Dandelium                                                 | <i>Taraxacum</i>                                              | Italy       | 25    | Osmolarity, acidity and hydrogen peroxide                 | [10] |  |
| Honeydews                                                 | -                                                             | Italy       | 25    | Osmolarity, acidity and hydrogen peroxide                 | [10] |  |
| Jarrah                                                    | <i>Eucalyptus marginata</i>                                   | Australia   | 18.1* | Hydrogen peroxide                                         | [12] |  |
| Jelly bush                                                | <i>Leptospermum polygalifolium</i>                            | Australia   | 2.3*  | Methylglyoxal                                             | [12] |  |
| Lime tree                                                 | <i>Tilia</i>                                                  | Italy       | 25    | Osmolarity, acidity and hydrogen peroxide                 | [10] |  |
| Manuka (medical grade)                                    | <i>Leptospermum scoparium</i>                                 | New Zealand | 12.5  | Methylglyoxal                                             | [10] |  |
| Manuka (MGO 1200+)                                        | <i>Leptospermum scoparium</i>                                 | New Zealand | 12.5  | Methylglyoxal                                             | [16] |  |
| Manuka (MGO 263+)                                         | <i>Leptospermum scoparium</i>                                 | New Zealand | 9.1*  | Methylglyoxal                                             | [8]  |  |
| Manuka (MGO 696+)                                         | <i>Leptospermum scoparium</i>                                 | New Zealand | 3     | Methylglyoxal                                             | [9]  |  |
| Manuka (MGO 971+)                                         | <i>Leptospermum scoparium</i>                                 | New Zealand | 4.5*  | Methylglyoxal, phenyllactic acid and methyl syringate     | [12] |  |
| Multiflora                                                | Pasture                                                       | New Zealand | 3.1   | Hydrogen peroxide                                         | [9]  |  |
| Multiflora                                                | -                                                             | Italy       | 12.5  | Osmolarity, acidity and hydrogen peroxide                 | [10] |  |
| Rhododendron                                              | <i>Rhododendron</i>                                           | Italy       | 25    | Osmolarity, acidity and hydrogen peroxide                 | [10] |  |
| Super manuka (MGO 400+)                                   | <i>Leptospermum polygalifolium</i>                            | Australia   | 9.1*  | Phenyllactic acid, hydrogen peroxide and methyl syringate | [12] |  |
| Tea tree                                                  | <i>Leptospermum lanigerum</i> & <i>Leptospermum scoparium</i> | Australia   | 2.3*  | Hydrogen peroxide, phenyllactic acid and Methyl syringate | [12] |  |

|                                   |                   |                                                                        |             |       |                                                 |      |
|-----------------------------------|-------------------|------------------------------------------------------------------------|-------------|-------|-------------------------------------------------|------|
|                                   | Tualang           | <i>Koompassia excelsa</i> ,<br>Multifloral by <i>Apis dorsata</i> bees | Malaysia    | 8.2*  | Hydrogen peroxide                               | [8]  |
|                                   | Ulmo 90           | <i>Eucryphia cordifolia</i>                                            | Chile       | 6.3   | Hydrogen peroxide                               | [16] |
| <i>Staphylococcus epidermidis</i> | Buckwheat         | <i>Fagopyrum esculentum</i><br>Moench                                  | Poland      | 3.1   | Hydrogen Peroxide, polyphenols and antioxidants | [13] |
|                                   | Chestnut          | <i>Aesculus</i>                                                        | Italy       | 6.3   | Hydrogen Peroxide, polyphenols and antioxidants | [13] |
|                                   | Honeydew          | -                                                                      | Poland      | 6.3   | Hydrogen Peroxide, polyphenols and antioxidants | [13] |
|                                   | Lime tree         | <i>Tilia</i>                                                           | Poland      | 3.1   | Hydrogen Peroxide, polyphenols and antioxidants | [13] |
|                                   | Multiflora        | -                                                                      | Poland      | 1.6   | Polyphenols and antioxidants                    | [13] |
|                                   | Multiflora        | -                                                                      | Kazakhstan  | 3.1   | Hydrogen Peroxide, polyphenols and antioxidants | [13] |
| <i>Streptococcus agalactiae</i>   | Manuka (MGO 263+) | <i>Leptospermum scoparium</i>                                          | New Zealand | 12.7* | Methylglyoxal                                   | [8]  |
|                                   | Tualang           | <i>Koompassia excelsa</i> ,<br>Multifloral by <i>Apis dorsata</i> bees | Malaysia    | 10.9* | Hydrogen peroxide                               | [8]  |
| <i>Streptococcus pyogenes</i>     | Manuka (MGO 263+) | <i>Leptospermum scoparium</i>                                          | New Zealand | 7.2*  | Methylglyoxal                                   | [8]  |
|                                   | Tualang           | <i>Koompassia excelsa</i> ,<br>Multifloral by <i>Apis dorsata</i> bees | Malaysia    | 7.2*  | Hydrogen peroxide                               | [8]  |

#### GRAM-NEGATIVE BACTERIA

| Strain inhibited | Honey Type | Honey/plant source<br>(species) | Origin | MIC<br>(% v/v) | Mechanism of action | Ref. |
|------------------|------------|---------------------------------|--------|----------------|---------------------|------|
|------------------|------------|---------------------------------|--------|----------------|---------------------|------|

|                                |                    |                                                                        |             |       |                                                                   |      |
|--------------------------------|--------------------|------------------------------------------------------------------------|-------------|-------|-------------------------------------------------------------------|------|
| <i>Acinetobacter baumannii</i> | Manuka (MGO 263+)  | <i>Leptospermum scoparium</i>                                          | New Zealand | 9.1*  | Methylglyoxal                                                     | [8]  |
|                                | Tualang            | <i>Koompassia excelsa</i> ,<br>Multifloral by <i>Apis dorsata</i> bees | Malaysia    | 7.2*  | Hydrogen peroxide                                                 | [8]  |
| <i>Enterobacter cloacae</i>    | Manuka (MGO 263+)  | <i>Leptospermum scoparium</i>                                          | New Zealand | 16.3* | Methylglyoxal                                                     | [8]  |
|                                | Tualang            | <i>Koompassia excelsa</i> ,<br>Multifloral by <i>Apis dorsata</i> bees | Malaysia    | 18.1* | Hydrogen peroxide                                                 | [8]  |
| <i>Escherichia coli</i>        | Agastache          | <i>Agastache Rugosa</i>                                                | Australia   | 6.3   | Methyl syringate, phenyllactic acid and hydrogen peroxide         | [12] |
|                                | Buckwheat          | <i>Fagopyrum esculentum</i><br>Moench                                  | Poland      | 6.3   | Hydrogen Peroxide, polyphenols and antioxidants                   | [13] |
|                                | Chestnut           | <i>Aesculus</i>                                                        | Italy       | 12.5  | Hydrogen Peroxide, polyphenols and antioxidants                   | [13] |
|                                | Chestnut           | <i>Aesculus</i>                                                        | Italy       | 25    | Osmolarity, acidity and hydrogen peroxide                         | [10] |
|                                | Dandelium          | <i>Taraxacum</i>                                                       | Italy       | 25    | Osmolarity, acidity and hydrogen peroxide                         | [10] |
|                                | Honeydew           | -                                                                      | Poland      | 12.5  | Hydrogen Peroxide, polyphenols and antioxidants                   | [13] |
|                                | Honeydews          | -                                                                      | Italy       | 12.5  | Osmolarity, acidity and hydrogen peroxide                         | [10] |
|                                | Jarrah             | <i>Eucalyptus marginata</i>                                            | Australia   | 25    | Hydrogen peroxide                                                 | [12] |
|                                | Jelly bush         | <i>Leptospermum polygalifolium</i>                                     | Australia   | 6.3   | Methylglyoxal                                                     | [12] |
|                                | Lime tree          | <i>Tilia</i>                                                           | Poland      | 6.3   | Hydrogen Peroxide, polyphenols and antioxidants                   | [13] |
|                                | Lime tree          | <i>Tilia</i>                                                           | Italy       | 25    | Osmolarity, acidity and hydrogen peroxide                         | [10] |
|                                | Manuka             | <i>Leptospermum scoparium</i>                                          | New Zealand | 12.5  | Methylglyoxal                                                     | [10] |
|                                | Manuka (MGO 1200+) | <i>Leptospermum scoparium</i>                                          | New Zealand | 12.5  | Methylglyoxal                                                     | [16] |
|                                | Manuka (MGO 250+)  | <i>Leptospermum scoparium</i>                                          | New Zealand | 25    | Methylglyoxal, high amount of polyphenolic compounds (flavonoids) | [11] |

|                          |                         |                                                                     |                     |       |                                                                   |      |
|--------------------------|-------------------------|---------------------------------------------------------------------|---------------------|-------|-------------------------------------------------------------------|------|
|                          | Manuka (MGO 263+)       | <i>Leptospermum scoparium</i>                                       | New Zealand         | 20    | Methylglyoxal                                                     | [8]  |
|                          | Manuka (MGO 400+)       | <i>Leptospermum scoparium</i>                                       | New Zealand         | 20    | Methylglyoxal, high amount of polyphenolic compounds (flavonoids) | [11] |
|                          | Manuka (MGO 971+)       | <i>Leptospermum scoparium</i>                                       | New Zealand         | 6.3   | Methylglyoxal, phenyllactic acid and methyl syringate             | [12] |
|                          | Multiflora              | -                                                                   | Poland              | 3.1   | Polyphenols and antioxidants                                      | [13] |
|                          | Multiflora              | -                                                                   | Italy               | 25    | Osmolarity, acidity and hydrogen peroxide                         | [10] |
|                          | Multiflora              | -                                                                   | Kazakhstan          | 12.5  | Hydrogen Peroxide, polyphenols and antioxidants                   | [13] |
|                          | Rhododendron            | <i>Rhododendron</i>                                                 | Italy               | 25    | Osmolarity, acidity and hydrogen peroxide                         | [10] |
|                          | Super manuka (MGO 400+) | <i>Leptospermum polygalifolium</i>                                  | Australia           | 25    | Phenyllactic acid, hydrogen peroxide and methyl syringate         | [12] |
|                          | Tea tree                | <i>Leptospermum lanigerum</i> & <i>Leptospermum scoparium</i>       | Tasmania, Australia | 12.5  | Hydrogen peroxide, phenyllactic acid and Methyl syringate         | [12] |
|                          | Tualang                 | <i>Koompassia excelsa</i> , Multifloral by <i>Apis dorsata</i> bees | Malaysia            | 22.5  | Hydrogen peroxide                                                 | [8]  |
|                          | Ulmo 90                 | <i>Eucryphia cordifolia</i>                                         | Chile               | 12.5  | Hydrogen peroxide                                                 | [16] |
| <i>Proteus mirabilis</i> | Chestnut                | <i>Aesculus</i>                                                     | Italy               | 25    | Osmolarity, acidity and hydrogen peroxide                         | [10] |
|                          | Dandelium               | <i>Taraxacum</i>                                                    | Italy               | 50    | Osmolarity, acidity and hydrogen peroxide                         | [10] |
|                          | Honeydews               | -                                                                   | Italy               | 25    | Osmolarity, acidity and hydrogen peroxide                         | [10] |
|                          | Lime tree               | <i>Tilia</i>                                                        | Italy               | 25    | Osmolarity, acidity and hydrogen peroxide                         | [10] |
|                          | Manuka                  | <i>Leptospermum scoparium</i>                                       | New Zealand         | 25    | Methylglyoxal                                                     | [10] |
|                          | Manuka (MGO 263+)       | <i>Leptospermum scoparium</i>                                       | New Zealand         | 16.3* | Methylglyoxal                                                     | [8]  |
|                          | Multiflora              | -                                                                   | Italy               | 25    | Osmolarity, acidity and hydrogen peroxide                         | [10] |
|                          | Rhododendron            | <i>Rhododendron</i>                                                 | Italy               | 50    | Osmolarity, acidity and hydrogen peroxide                         | [10] |



|                               |                    |                                                                        |             |       |                                                                   |      |
|-------------------------------|--------------------|------------------------------------------------------------------------|-------------|-------|-------------------------------------------------------------------|------|
|                               | Tualang            | <i>Koompassia excelsa</i> ,<br>Multifloral by <i>Apis dorsata</i> bees | Malaysia    | 16.3* | Hydrogen peroxide                                                 | [8]  |
| <i>Pseudomonas aeruginosa</i> | Agastache          | <i>Agastache Rugosa</i>                                                | Australia   | 4.5*  | Methyl syringate, phenyllactic acid and hydrogen peroxide         | [12] |
|                               | Buckwheat          | <i>Fagopyrum esculentum</i><br>Moench                                  | Poland      | 3.1   | Hydrogen Peroxide, polyphenols and antioxidants                   | [13] |
|                               | Chestnut           | <i>Aesculus</i>                                                        | Italy       | 12.5  | Hydrogen Peroxide, polyphenols and antioxidants                   | [13] |
|                               | Chestnut           | <i>Aesculus</i>                                                        | Italy       | 25    | Osmolarity, acidity and hydrogen peroxide                         | [10] |
|                               | Dandelium          | <i>Taraxacum</i>                                                       | Italy       | 50    | Osmolarity, acidity and hydrogen peroxide                         | [10] |
|                               | Eucalyptus         | <i>Eucalyptus</i>                                                      | Algeria     | 12    | -                                                                 | [17] |
|                               | Honeydew           | ( <i>Abies Alba</i> )                                                  | Poland      | >25   | High total amount of polyphenolic compounds (flavonoids)          | [11] |
|                               | Honeydew           | -                                                                      | Poland      | 12.5  | Hydrogen Peroxide, polyphenols and antioxidants                   | [13] |
|                               | Honeydews          | -                                                                      | Italy       | 25    | Osmolarity, acidity and hydrogen peroxide                         | [10] |
|                               | Jarra              | <i>Eucalyptus marginata</i>                                            | Australia   | 9.1*  | Hydrogen peroxide                                                 | [12] |
|                               | Jelly bush         | <i>Leptospermum polygalifolium</i>                                     | Australia   | 9.1*  | Methylglyoxal                                                     | [12] |
|                               | Lime tree          | <i>Tilia</i>                                                           | Poland      | 6.25  | Hydrogen Peroxide, polyphenols and antioxidants                   | [13] |
|                               | Lime tree          | <i>Tilia</i>                                                           | Italy       | 25    | Osmolarity, acidity and hydrogen peroxide                         | [10] |
|                               | Manuka             | <i>Leptospermum scoparium</i>                                          | New Zealand | 25    | Methylglyoxal                                                     | [10] |
|                               | Manuka (MGO 1200+) | <i>Leptospermum scoparium</i>                                          | New Zealand | 12.5  | Methylglyoxal                                                     | [16] |
|                               | Manuka (MGO 250+)  | <i>Leptospermum scoparium</i>                                          | New Zealand | >25   | Methylglyoxal, high amount of polyphenolic compounds (flavonoids) | [11] |
|                               | Manuka (MGO 263+)  | <i>Leptospermum scoparium</i>                                          | New Zealand | 12.7* | Methylglyoxal                                                     | [8]  |
|                               | Manuka (MGO 400+)  | <i>Leptospermum scoparium</i>                                          | New Zealand | >25   | Methylglyoxal, high amount of polyphenolic compounds (flavonoids) | [11] |

|                               |                         |                                                               |                     |       |                                                                   |      |
|-------------------------------|-------------------------|---------------------------------------------------------------|---------------------|-------|-------------------------------------------------------------------|------|
|                               | Manuka (MGO 550+)       | <i>Leptospermum scoparium</i>                                 | New Zealand         | 12.5  | Methylglyoxal                                                     | [14] |
|                               | Manuka (MGO 971+)       | <i>Leptospermum scoparium</i>                                 | New Zealand         | 18.1* | Methylglyoxal, phenyllactic acid and methyl syringate             | [12] |
|                               | Multiflora              | Herbs                                                         | Greece              | 6.3   | Hydrogen peroxide                                                 | [14] |
|                               | Multiflora              | -                                                             | Poland              | 3.1   | Polyphenols and antioxidants                                      | [13] |
|                               | Multiflora              | -                                                             | Kazakhstan          | 6.3   | Hydrogen Peroxide, polyphenols and antioxidants                   | [13] |
|                               | Multiflora              | -                                                             | Italy               | 25    | Osmolarity, acidity and hydrogen peroxide                         | [10] |
|                               | Orange blossom          | <i>Citrus sinensis</i>                                        | Algeria             | 18    | -                                                                 | [17] |
|                               | Origan and clover       | <i>Trifolium</i>                                              | Greece              | 6.3   | Hydrogen Peroxide and antibacterial proteinaceous compounds       | [14] |
|                               | Rhododendron            | <i>Rhododendron</i>                                           | Italy               | 50    | Osmolarity, acidity and hydrogen peroxide                         | [10] |
|                               | Super manuka (MGO 400+) | <i>Leptospermum polygalifolium</i>                            | Australia           | 9.1*  | Phenyllactic acid, hydrogen peroxide and methyl syringate         | [12] |
|                               | Tea tree                | <i>Leptospermum lanigerum</i> & <i>Leptospermum scoparium</i> | Tasmania, Australia | 4.5*  | Hydrogen peroxide, phenyllactic acid and Methyl syringate         | [12] |
|                               | Tualang                 | Multifloral by <i>Apis dorsata</i> bees                       | Malaysia            | 12.7* | Hydrogen peroxide                                                 | [8]  |
|                               | Ulmo 90                 | <i>Eucryphia cordifolia</i>                                   | Chile               | 12.5  | Hydrogen peroxide                                                 | [16] |
| <i>Salmonella</i> Enteritidis | Honeydew                | ( <i>Abies Alba</i> )                                         | Poland              | >25   | High total amount of polyphenolic compounds (flavonoids)          | [11] |
|                               | Manuka (MGO 250+)       | <i>Leptospermum scoparium</i>                                 | New Zealand         | >25   | Methylglyoxal, high amount of polyphenolic compounds (flavonoids) | [11] |
|                               | Manuka (MGO 400+)       | <i>Leptospermum scoparium</i>                                 | New Zealand         | 25    | Methylglyoxal, high amount of polyphenolic compounds (flavonoids) | [11] |
| <i>Salmonella</i> Typhimurium | Honeydew                | ( <i>Abies Alba</i> )                                         | Poland              | >25   | High total amount of polyphenolic compounds (flavonoids)          | [11] |

|                                     |                   |                                                                        |             |       |                                                                   |      |
|-------------------------------------|-------------------|------------------------------------------------------------------------|-------------|-------|-------------------------------------------------------------------|------|
|                                     | Manuka (MGO 250+) | <i>Leptospermum scoparium</i>                                          | New Zealand | 25    | Methylglyoxal, high amount of polyphenolic compounds (flavonoids) | [11] |
|                                     | Manuka (MGO 263+) | <i>Leptospermum scoparium</i>                                          | New Zealand | 12.7* | Methylglyoxal                                                     | [8]  |
|                                     | Manuka (MGO 400+) | <i>Leptospermum scoparium</i>                                          | New Zealand | 25    | Methylglyoxal, high amount of polyphenolic compounds (flavonoids) | [11] |
|                                     | Tualang           | <i>Koompassia excelsa</i> ,<br>Multifloral by <i>Apis dorsata</i> bees | Malaysia    | 10.9* | Hydrogen peroxide                                                 | [8]  |
| <i>Shigella flexner</i>             | Manuka (MGO 263+) | <i>Leptospermum scoparium</i>                                          | New Zealand | 18.1* | Methylglyoxal                                                     | [8]  |
|                                     | Tualang           | <i>Koompassia excelsa</i> ,<br>Multifloral by <i>Apis dorsata</i> bees | Malaysia    | 18.1* | Hydrogen peroxide                                                 | [8]  |
| <i>Stenotrophomonas maltophilia</i> | Manuka (MGO 263+) | <i>Leptospermum scoparium</i>                                          | New Zealand | 7.2*  | Methylglyoxal                                                     | [8]  |
|                                     | Tualang           | <i>Koompassia excelsa</i> ,<br>Multifloral by <i>Apis dorsata</i> bees | Malaysia    | 7.2*  | Hydrogen peroxide                                                 | [8]  |

\* MIC values converted from %w/v to %v/v using the honey density of 1.38g/mL (lowest reported density), to report the highest possible MIC.

**Table S3.** Fungal strains inhibited by different honey types, their corresponding MIC values and mechanism of action suggested by the authors.

| FUNGAL STRAINS               |             |                                                      |          |             |                                                                                                                                                    |      |
|------------------------------|-------------|------------------------------------------------------|----------|-------------|----------------------------------------------------------------------------------------------------------------------------------------------------|------|
| Strain inhibited             | Honey Type  | Honey source (species)                               | Origin   | MIC (% v/v) | Mechanism of action                                                                                                                                | Ref. |
| <i>Aspergillus flavus</i>    | Alfalfa     | <i>Alfalfa</i>                                       | Iran     | 25          | High phenolic content: tannins, pectin substances, saponines, amines, triterpene glycosides, purines base, phytoestrogens, flavones, isoflavonoids | [18] |
|                              | Astragalus  | <i>Astragalus</i>                                    | Iran     | 35          | Acidic pH, hydrogen peroxide and high osmolarity                                                                                                   | [18] |
|                              | Chamaemelum | <i>Chamaemelum nobile</i>                            | Iran     | 55          | Acidic pH, hydrogen peroxide and high osmolarity                                                                                                   | [18] |
|                              | Citrus      | <i>Citrus</i>                                        | Iran     | 50          | Acidic pH, hydrogen peroxide and high osmolarity                                                                                                   | [18] |
|                              | Multiflora  | Multifloral                                          | Iran     | 35          | Acidic pH, hydrogen peroxide and high osmolarity                                                                                                   | [18] |
|                              | Thymus      | <i>Thymus vulgaris</i>                               | Iran     | 35          | High phenolic content: caravacrol, thymol and gamma terpinene                                                                                      | [18] |
|                              | Zizyphus    | <i>Zizyphus</i>                                      | Iran     | 55          | Acidic pH, hydrogen peroxide and high osmolarity                                                                                                   | [18] |
| <i>Aspergillus fumigatus</i> | Alfalfa     | <i>Alfalfa</i>                                       | Iran     | 25          | High phenolic content: tannins, pectin substances, saponines, amines, triterpene glycosides, purines base, phytoestrogens, flavones, isoflavonoids | [18] |
|                              | Astragalus  | <i>Astragalus</i>                                    | Iran     | 40          | Acidic pH, hydrogen peroxide and high osmolarity                                                                                                   | [18] |
|                              | Chamaemelum | <i>Chamaemelum nobile</i>                            | Iran     | 55          | Acidic pH, hydrogen peroxide and high osmolarity                                                                                                   | [18] |
|                              | Citrus      | <i>Citrus</i>                                        | Iran     | 55          | Acidic pH, hydrogen peroxide and high osmolarity                                                                                                   | [18] |
|                              | Multiflora  | Multifloral                                          | Iran     | 35          | Acidic pH, hydrogen peroxide and high osmolarity                                                                                                   | [18] |
|                              | Thymus      | <i>Thymus vulgaris</i>                               | Iran     | 35          | High phenolic content: caravacrol, thymol and gamma terpinene                                                                                      | [18] |
|                              | Zizyphus    | <i>Zizyphus</i>                                      | Iran     | 60          | Acidic pH, hydrogen peroxide and high osmolarity                                                                                                   | [18] |
| <i>Aspergillus niger</i>     | Acacia      | <i>Acacia mangium</i> trees by <i>Apis mellifera</i> | Malaysia | 15          | -                                                                                                                                                  | [19] |

|                         |              |                                                                     |           |      |                                                                                                                                                    |      |
|-------------------------|--------------|---------------------------------------------------------------------|-----------|------|----------------------------------------------------------------------------------------------------------------------------------------------------|------|
|                         | Alfalfa      | <i>Alfalfa</i>                                                      | Iran      | 30   | High phenolic content: tannins, pectin substances, saponines, amines, triterpene glycosides, purines base, phytoestrogens, flavones, isoflavonoids | [18] |
|                         | Astragalus   | <i>Astragalus</i>                                                   | Iran      | 35   | Acidic pH, hydrogen peroxide and high osmolarity                                                                                                   | [18] |
|                         | Chamaemelum  | <i>Chamaemelum nobile</i>                                           | Iran      | 55   | Acidic pH, hydrogen peroxide and high osmolarity                                                                                                   | [18] |
|                         | Citrus       | <i>Citrus</i>                                                       | Iran      | 55   | Acidic pH, hydrogen peroxide and high osmolarity                                                                                                   | [18] |
|                         | Kelulut      | Malaysian stingless bee                                             | Malaysia  | 10   | -                                                                                                                                                  | [19] |
|                         | Multiflora   | Multifloral                                                         | Iran      | 40   | Acidic pH, hydrogen peroxide and high osmolarity                                                                                                   | [18] |
|                         | Thymus       | <i>Thymus vulgaris</i>                                              | Iran      | 35   | High phenolic content: caravacrol, thymol and gamma terpinene                                                                                      | [18] |
|                         | Tualang      | <i>Koompassia excelsa</i> , Multifloral by <i>Apis dorsata</i> bees | Malaysia  | 25   | -                                                                                                                                                  | [19] |
|                         | Zizyphus     | <i>Zizyphus</i>                                                     | Iran      | 55   | Acidic pH, hydrogen peroxide and high osmolarity                                                                                                   | [18] |
| <i>Candida albicans</i> | A. mellifera | Multifloral, <i>Apis mellifera</i> bee                              | Mexico    | 40   | Flavonoids cause shrinkage of cell membrane, loss of polarization, and damages on the cell walls of <i>C. albicans</i> .                           | [20] |
|                         | Acacia       | <i>Acacia mangium</i> trees by <i>Apis mellifera</i>                | Malaysia  | 15   | -                                                                                                                                                  | [19] |
|                         | Agastache    | <i>Agastache Rugosa</i>                                             | Australia | 29*  | Phenolic compounds: Phenol, 2,4-bis(1,1-dimethylethyl), estragole and nonanoic acid and ethyl ester                                                | [21] |
|                         | Alfalfa      | <i>Alfalfa</i>                                                      | Iran      | 24.5 | High phenolic content: tannins, pectin substances, saponines, amines, triterpene glycosides, purines base, phytoestrogens, flavones, isoflavonoids | [18] |

|                      |                                                                 |              |        |                                                                                                       |      |
|----------------------|-----------------------------------------------------------------|--------------|--------|-------------------------------------------------------------------------------------------------------|------|
| Artificial honey     | 7.5 g sucrose, 37.5 g maltose,                                  | Laboratory   | 30.9*  | Osmolarity                                                                                            | [22] |
|                      | 167.5 g glucose, and 202.5 g fructose in 85 mL of sterile water |              |        |                                                                                                       |      |
| Astragalus           | <i>Astragalus</i>                                               | Iran         | 32     | Acidic pH, hydrogen peroxide and high osmolarity                                                      | [18] |
| Chamomile            | <i>Chamaemelum nobile</i>                                       | Iran         | 44     | Acidic pH, hydrogen peroxide and high osmolarity                                                      | [18] |
| Citrus               | <i>Citrus</i>                                                   | Iran         | 42     | Acidic pH, hydrogen peroxide and high osmolarity                                                      | [18] |
| Comvita 18+          | <i>Leptospermum</i>                                             | New Zealand  | 28.9*  | Methylglyoxal                                                                                         | [22] |
| Heather              | <i>Erica</i>                                                    | Portugal     | >43.5* | Phenolic compounds. Potential chemical markers: ellagic acid and myricetin-30-methylether             | [23] |
| Jarrah               | <i>Eucalyptus marginata</i>                                     | Australia    | 29*    | Hydrogen peroxide and volatile and phenolic compounds: isophorone and Nonanoic acid                   | [21] |
| Jarrah               | <i>Eucalyptus marginata</i>                                     | Australia    | 13.4*  | Hydrogen peroxide                                                                                     | [22] |
| Jellybush            | <i>Leptospermum polygalifolium</i>                              | Australia    | 29*    | Volatile and phenolic compounds: linalool and nonanal                                                 | [21] |
| Jujube               | <i>Zizyphus spina-christi</i>                                   | Saudi Arabia | 29*    | Interference with cell membrane integrity, affects exopolysaccharide composition of biofilms          | [24] |
| Kelulut              | Malaysian stingless bee                                         | Malaysia     | 10     | -                                                                                                     | [19] |
| M. beecheii          | Multifloral, <i>Melipona beecheii</i> bee                       | Mexico       | 35     | Flavonoids cause loss of polarization of growth, cellular lysis and cell walls damage of C. albicans. | [20] |
| Mad Honey (>2 mg/mL) | <i>Rhododendron</i>                                             | Turkey       | 0.1*   | Phenolic compounds: linalool, phenethyl alcohol and benzyl alcohol                                    | [25] |
| Manuka               | <i>Leptospermum scoparium</i>                                   | New Zealand  | 29*    | Acetanisole and Methyl 3,5-dimethoxy benzoate                                                         | [21] |

|                             |                              |                                                               |             |       |                                                                                                                                                    |      |
|-----------------------------|------------------------------|---------------------------------------------------------------|-------------|-------|----------------------------------------------------------------------------------------------------------------------------------------------------|------|
|                             | Medihoney Barrier            | Blend of <i>Leptospermum</i> and hydrogen peroxide honeys     | -           | 27.7* | Methylglyoxal and hydrogen peroxide                                                                                                                | [22] |
|                             | Multiflora                   | -                                                             | Iran        | 35    | Acidic pH, hydrogen peroxide and high osmolarity                                                                                                   | [18] |
|                             | Surgihoney RO™- low potency  | -                                                             | -           | 1.2*  | Hydrogen peroxide                                                                                                                                  | [26] |
|                             | Surgihoney RO™- high potency | -                                                             | -           | 0.3*  | Hydrogen peroxide                                                                                                                                  | [26] |
|                             | Tea Tree                     | <i>Leptospermum lanigerum</i> & <i>Leptospermum scoparium</i> | Australia   | 29*   | Hydrogen Peroxide and major volatile compounds: Acetanisole, and Methyl 3,5-dimethoxy benzoate                                                     | [21] |
|                             | Thymus                       | <i>Thymus vulgaris</i>                                        | Iran        | 26    | High phenolic content: caravacrol, thymol and gamma terpinene                                                                                      | [18] |
|                             | Tualang                      | Multifloral by <i>Apis dorsata</i> bees                       | Malaysia    | 25    | -                                                                                                                                                  | [19] |
|                             | Zizyphus                     | <i>Zizyphus</i>                                               | Iran        | 48    | Acidic pH, hydrogen peroxide and high osmolarity                                                                                                   | [18] |
| <i>Candida dubliniensis</i> | Alfalfa                      | <i>Alfalfa</i>                                                | Iran        | 15    | High phenolic content: tannins, pectin substances, saponines, amines, triterpene glycosides, purines base, phytoestrogens, flavones, isoflavonoids | [18] |
|                             | Artificial honey             | -                                                             | -           | 24.9* | Osmolarity                                                                                                                                         | [22] |
|                             | Astragalus                   | <i>Astragalus</i>                                             | Iran        | 25    | Acidic pH, hydrogen peroxide and high osmolarity                                                                                                   | [18] |
|                             | Chamaemelum                  | <i>Chamaemelum nobile</i>                                     | Iran        | 40    | Acidic pH, hydrogen peroxide and high osmolarity                                                                                                   | [18] |
|                             | Citrus                       | <i>Citrus</i>                                                 | Iran        | 35    | Acidic pH, hydrogen peroxide and high osmolarity                                                                                                   | [18] |
|                             | Comvita 18+                  | <i>Leptospermum</i>                                           | New Zealand | 24.2* | Methylglyoxal                                                                                                                                      | [22] |
|                             | Jarrah                       | <i>Eucalyptus marginata</i>                                   | Australia   | 11.2* | Hydrogen peroxide                                                                                                                                  | [22] |

|                         |                   |                                                                                                |             |       |                                                                                                                                                    |      |
|-------------------------|-------------------|------------------------------------------------------------------------------------------------|-------------|-------|----------------------------------------------------------------------------------------------------------------------------------------------------|------|
|                         | Medihoney Barrier | Blend of <i>Leptospermum</i> and hydrogen peroxide honeys                                      | -           | 25.1* | Methylglyoxal and hydrogen peroxide                                                                                                                | [22] |
|                         | Multiflora        | Multifloral                                                                                    | Iran        | 30    | Acidic pH, hydrogen peroxide and high osmolarity                                                                                                   | [18] |
|                         | Thymus            | <i>Thymus vulgaris</i>                                                                         | Iran        | 20    | High phenolic content: caravacrol, thymol and gamma terpinene                                                                                      | [18] |
|                         | Zizyphus          | <i>Zizyphus</i>                                                                                | Iran        | 45    | Acidic pH, hydrogen peroxide and high osmolarity                                                                                                   | [18] |
| <i>Candida glabrata</i> | Alfalfa           | <i>Alfalfa</i>                                                                                 | Iran        | 23    | High phenolic content: tannins, pectin substances, saponines, amines, triterpene glycosides, purines base, phytoestrogens, flavones, isoflavonoids | [18] |
|                         | Artificial honey  | 7.5 g sucrose, 37.5 g maltose, 167.5 g glucose, and 202.5 g fructose in 85 mL of sterile water | Laboratory  | 32.4* | Osmolarity                                                                                                                                         | [22] |
|                         | Astragalus        | <i>Astragalus</i>                                                                              | Iran        | 30.5  | Acidic pH, hydrogen peroxide and high osmolarity                                                                                                   | [18] |
|                         | Chamaemelum       | <i>Chamaemelum nobile</i>                                                                      | Iran        | 47    | Acidic pH, hydrogen peroxide and high osmolarity                                                                                                   | [18] |
|                         | Citrus            | <i>Citrus</i>                                                                                  | Iran        | 40    | Acidic pH, hydrogen peroxide and high osmolarity                                                                                                   | [18] |
|                         | Comvita 18+       | <i>Leptospermum</i>                                                                            | New Zealand | 30.9* | Methylglyoxal                                                                                                                                      | [22] |
|                         | Jarrah            | <i>Eucalyptus marginata</i>                                                                    | Australia   | 21.7* | Hydrogen peroxide                                                                                                                                  | [22] |
|                         | Medihoney Barrier | Blend of <i>Leptospermum</i> and hydrogen peroxide honeys                                      | -           | 31.2* | Methylglyoxal and hydrogen peroxide                                                                                                                | [22] |
|                         | Multiflora        | Multifloral                                                                                    | Iran        | 28.5  | Acidic pH, hydrogen peroxide and high osmolarity                                                                                                   | [18] |
|                         | Thymus            | <i>Thymus vulgaris</i>                                                                         | Iran        | 26    | High phenolic content: caravacrol, thymol and gamma terpinene                                                                                      | [18] |



|                             |             |                           |          |       |                                                                                                                                                    |      |
|-----------------------------|-------------|---------------------------|----------|-------|----------------------------------------------------------------------------------------------------------------------------------------------------|------|
|                             | Zizyphus    | <i>Zizyphus</i>           | Iran     | 45    | Acidic pH, hydrogen peroxide and high osmolarity                                                                                                   | [18] |
| <i>Candida kefyr</i>        | Alfalfa     | <i>Alfalfa</i>            | Iran     | 30    | High phenolic content: tannins, pectin substances, saponines, amines, triterpene glycosides, purines base, phytoestrogens, flavones, isoflavonoids | [18] |
|                             | Astragalus  | <i>Astragalus</i>         | Iran     | 35    | Acidic pH, hydrogen peroxide and high osmolarity                                                                                                   | [18] |
|                             | Chamaemelum | <i>Chamaemelum nobile</i> | Iran     | 55    | Acidic pH, hydrogen peroxide and high osmolarity                                                                                                   | [18] |
|                             | Citrus      | <i>Citrus</i>             | Iran     | 55    | Acidic pH, hydrogen peroxide and high osmolarity                                                                                                   | [18] |
|                             | Multiflora  | Multifloral               | Iran     | 40    | Acidic pH, hydrogen peroxide and high osmolarity                                                                                                   | [18] |
|                             | Thymus      | <i>Thymus vulgaris</i>    | Iran     | 35    | High phenolic content: caravacrol, thymol and gamma terpinene                                                                                      | [18] |
|                             | Zizyphus    | <i>Zizyphus</i>           | Iran     | 55    | Acidic pH, hydrogen peroxide and high osmolarity                                                                                                   | [18] |
| <i>Candida krusei</i>       | Alfalfa     | <i>Alfalfa</i>            | Iran     | 23.5  | High phenolic content: tannins, pectin substances, saponines, amines, triterpene glycosides, purines base, phytoestrogens, flavones, isoflavonoids | [18] |
|                             | Astragalus  | <i>Astragalus</i>         | Iran     | 32    | Acidic pH, hydrogen peroxide and high osmolarity                                                                                                   | [18] |
|                             | Chamaemelum | <i>Chamaemelum nobile</i> | Iran     | 49.5  | Acidic pH, hydrogen peroxide and high osmolarity                                                                                                   | [18] |
|                             | Citrus      | <i>Citrus</i>             | Iran     | 42    | Acidic pH, hydrogen peroxide and high osmolarity                                                                                                   | [18] |
|                             | Heather     | <i>Erica</i>              | Portugal | 43.5* | Phenolic compounds. Potential chemical markers: ellagic acid and myricetin-30-methylether                                                          | [23] |
|                             | Multiflora  | Multifloral               | Iran     | 35    | Acidic pH, hydrogen peroxide and high osmolarity                                                                                                   | [18] |
|                             | Thymus      | <i>Thymus vulgaris</i>    | Iran     | 23.5  | High phenolic content: caravacrol, thymol and gamma terpinene                                                                                      | [18] |
|                             | Zizyphus    | <i>Zizyphus</i>           | Iran     | 50    | Acidic pH, hydrogen peroxide and high osmolarity                                                                                                   | [18] |
| <i>Candida parapsilosis</i> | Alfalfa     | <i>Alfalfa</i>            | Iran     | 25    | High phenolic content: tannins, pectin substances, saponines, amines, triterpene glycosides, purines base, phytoestrogens, flavones, isoflavonoids | [18] |
|                             | Astragalus  | <i>Astragalus</i>         | Iran     | 30    | Acidic pH, hydrogen peroxide and high osmolarity                                                                                                   | [18] |
|                             | Chamaemelum | <i>Chamaemelum nobile</i> | Iran     | 45    | Acidic pH, hydrogen peroxide and high osmolarity                                                                                                   | [18] |
|                             | Citrus      | <i>Citrus</i>             | Iran     | 40    | Acidic pH, hydrogen peroxide and high osmolarity                                                                                                   | [18] |

|                                    |             |                                                            |           |        |                                                                                                                                                    |      |
|------------------------------------|-------------|------------------------------------------------------------|-----------|--------|----------------------------------------------------------------------------------------------------------------------------------------------------|------|
|                                    | Multiflora  | Multifloral                                                | Iran      | 35     | Acidic pH, hydrogen peroxide and high osmolarity                                                                                                   | [18] |
|                                    | Thymus      | <i>Thymus vulgaris</i>                                     | Iran      | 25     | High phenolic content: caravacrol, thymol and gamma terpinene                                                                                      | [18] |
|                                    | Zizyphus    | <i>Zizyphus</i>                                            | Iran      | 50     | Acidic pH, hydrogen peroxide and high osmolarity                                                                                                   | [18] |
| <i>Candida neoformans</i>          | Heather     | <i>Erica</i>                                               | Portugal  | >43.5* | Phenolic compounds. Potential chemical markers: ellagic acid and myricetin-30-methylether                                                          | [23] |
| <i>Candida tropicalis</i>          | Alfalfa     | <i>Alfalfa</i>                                             | Iran      | 25     | High phenolic content: tannins, pectin substances, saponines, amines, triterpene glycosides, purines base, phytoestrogens, flavones, isoflavonoids | [18] |
|                                    | Astragalus  | <i>Astragalus</i>                                          | Iran      | 30     | Acidic pH, hydrogen peroxide and high osmolarity                                                                                                   | [18] |
|                                    | Chamaemelum | <i>Chamaemelum nobile</i>                                  | Iran      | 46     | Acidic pH, hydrogen peroxide and high osmolarity                                                                                                   | [18] |
|                                    | Citrus      | <i>Citrus</i>                                              | Iran      | 43     | Acidic pH, hydrogen peroxide and high osmolarity                                                                                                   | [18] |
|                                    | Multiflora  | Multifloral                                                | Iran      | 35     | Acidic pH, hydrogen peroxide and high osmolarity                                                                                                   | [18] |
|                                    | Thymus      | <i>Thymus vulgaris</i>                                     | Iran      | 26.5   | High phenolic content: caravacrol, thymol and gamma terpinene                                                                                      | [18] |
|                                    | Zizyphus    | <i>Zizyphus</i>                                            | Iran      | 46     | Acidic pH, hydrogen peroxide and high osmolarity                                                                                                   | [18] |
| <i>Trichophyton mentagrophytes</i> | Agastache   | <i>Agastache Rugosa</i>                                    | Australia | 29*    | Phenolic compounds: Phenol, 2,4-bis(1,1-dimethylethyl), estragole and nonanoic acid and ethyl ester                                                | [21] |
|                                    | Tea Tree    | <i>Leptospermum lanigerum &amp; Leptospermum scoparium</i> | Australia | 29*    | Hydrogen Peroxide and major volatile compounds: Acetanisole, and Methyl 3,5-dimethoxy benzoate                                                     | [21] |
| <i>Trichophyton rubrum</i>         | Agastache   | <i>Agastache Rugosa</i>                                    | Australia | 29*    | Phenolic compounds: Phenol, 2,4-bis(1,1-dimethylethyl), estragole and nonanoic acid and ethyl ester                                                | [21] |
|                                    | Alfalfa     | <i>Alfalfa</i>                                             | Iran      | 20     | High phenolic content: tannins, pectin substances, saponines, amines, triterpene glycosides, purines base, phytoestrogens, flavones, isoflavonoids | [18] |
|                                    | Astragalus  | <i>Astragalus</i>                                          | Iran      | 31     | Acidic pH, hydrogen peroxide and high osmolarity                                                                                                   | [18] |

|             |                               |             |     |                                                              |      |
|-------------|-------------------------------|-------------|-----|--------------------------------------------------------------|------|
| Chamaemelum | <i>Chamaemelum nobile</i>     | Iran        | 43  | Acidic pH, hydrogen peroxide and high osmolarity             | [18] |
| Citrus      | <i>Citrus</i>                 | Iran        | 39  | Acidic pH, hydrogen peroxide and high osmolarity             | [18] |
| Manuka      | <i>Leptospermum scoparium</i> | New Zealand | 29* | Acetanisole, and Methyl 3,5-dimethoxy benzoate               | [18] |
| Multiflora  | Multifloral                   | Iran        | 25  | Acidic pH, hydrogen peroxide and high osmolarity             | [18] |
| Thymus      | <i>Thymus vulgaris</i>        | Iran        | 22  | High phenolic content: carvacrol, thymol and gamma terpinene | [18] |
| Zizyphus    | <i>Zizyphus</i>               | Iran        | 44  | Acidic pH, hydrogen peroxide and high osmolarity             | [18] |

\* MIC values converted from %w/v to %v/v using the honey density of 1.38g/mL (lowest reported density), to report the highest possible MIC.

---

## References

1. Comvita. UMF™ Manuka Honey. Available online: <<https://www.comvita.co.uk/category/umf-manuka-honey/range00001>> (accessed on 28 August 2020).
2. Egmonthoney. Products. Available online: <<https://egmonthoney.co.uk/collections/all>> (accessed on 28 August 2020).
3. Manuka Doctor. Manuka Honey. Available online: <<https://www.manukadoctor.co.uk/collections/manuka-honey>> (accessed on 28 August 2020).
4. Savant Distribution. MGO Manuka Honey. Available online: <<https://www.manukahealthuk.com/shop/mgo-manuka-honey.html>> (accessed on 28 August 2020).
5. Manuka Pharm. Manuka Honey. Available online: <<https://www.manukapharm.co.uk/collections/manuka-honey>> (accessed on 28 August 2020).
6. Melora. MELORA MĀNUKA HONEY. Available online: <<https://www.melora.co.uk/collections/manuka-honey-food>> (accessed on 28 August 2020).
7. Optima Health and Nutrition. PREMIUM SELECT MANUKA HONEY. Available online: <<https://optimah.com/pages/pure-gold-premium-manuka-honey>> (accessed on 28 August 2020).
8. Tan, H.T.; Rahman, R.A.; Gan, S.H.; Halim, A.S.; Hassan, S.A.; Sulaiman, S.A.; Kirnpal-Kaur, B.S. The antibacterial properties of Malaysian tualang honey against wound and enteric microorganisms in comparison to manuka honey. *BMC Complement. Altern. Med.* **2009**, *9*, 8, doi:10.1186/1472-6882-9-34.
9. Cooper, R.A.; Molan, P.C.; Harding, K.G. The sensitivity to honey of Gram-positive cocci of clinical significance isolated from wounds. *J. Appl. Microbiol.* **2002**, *93*, 857-863, doi:10.1046/j.1365-2672.2002.01761.x.
10. Grego, E.; Robino, P.; Tramuta, C.; Giusto, G.; Boi, M.; Colombo, R.; Serra, G.; Chiado-Cutin, S.; Gandini, M.; Nebbia, P. Evaluation of antimicrobial activity of Italian honey for wound healing application in veterinary medicine. *Schweiz. Arch. Tierheilkd.* **2016**, *158*, 521-527, doi:10.17236/sat00075.
11. Goslinski, M.; Nowak, D.; Klebukowska, L. Antioxidant properties and antimicrobial activity of manuka honey versus Polish honeys. *J. Food Sci. Technol.-Mysore* **2020**, *57*, 1269-1277, doi:10.1007/s13197-019-04159-w.
12. Anand, S.; Deighton, M.; Livanos, G.; Morrison, P.D.; Pang, E.C.K.; Mantri, N. Antimicrobial Activity of Agastache Honey and Characterization of Its Bioactive Compounds in Comparison With Important Commercial Honeys. *Front. Microbiol.* **2019**, *10*, 16, doi:10.3389/fmicb.2019.00263.
13. Grecka, K.; Kus, P.M.; Worobo, R.W.; Szwed, P. Study of the Anti-Staphylococcal Potential of Honeys Produced in Northern Poland. *Molecules* **2018**, *23*, 23, doi:10.3390/molecules23020260.
14. Anthimidou, E.; Mossialos, D. Antibacterial Activity of Greek and Cypriot Honeys Against Staphylococcus aureus and Pseudomonas aeruginosa in Comparison to Manuka Honey. *J. Med. Food* **2013**, *16*, 42-47, doi:10.1089/jmf.2012.0042.
15. Miorin, P.L.; Junior, N.C.L.; Custodio, A.R.; Bretz, W.A.; Marcucci, M.C. Antibacterial activity of honey and propolis from Apis mellifera and Tetragonisca angustula against Staphylococcus aureus. *J. Appl. Microbiol.* **2003**, *95*, 913-920, doi:10.1046/j.1365-2672.2003.02050.x.
16. Sherlock, O.; Dolan, A.; Athman, R.; Power, A.; Gethin, G.; Cowman, S.; Humphreys, H. Comparison of the antimicrobial activity of Ulmo honey from Chile and Manuka honey against methicillin-resistant Staphylococcus aureus, Escherichia coli and Pseudomonas aeruginosa. *BMC Complement. Altern. Med.* **2010**, *10*, 5, doi:10.1186/1472-6882-10-47.
17. Boukraa, L. Additive Activity of Royal Jelly and Honey Against Pseudomonas aeruginosa. *Altern. Med. Rev.* **2008**, *13*, 330-333.

- 
18. Katiraei, F.; Mahmodi, R.; Mardani, K.; Babaei, E. ANTIFUNGAL ACTIVITY OF IRANIAN HONEYBEES AGAINST CANDIDA, ASPERGILLUS SPECIES AND TRICHOPHYTON RUBRUM. *J. Food Process Preserv.* **2014**, *38*, 2078-2082, doi:10.1111/jfpp.12187.
  19. Hamid, Z.; Mohamad, I.; Harun, A.; Salim, R.; Sulaiman, S.A. Antifungal Effect of Three Local Malaysian Honeys on Selected Pathogenic Fungi of Ootomycosis: An in vitro Evaluation. *J. Young Pharm.* **2018**, *10*, 414-417, doi:10.5530/jyp.2018.10.91.
  20. Hau-Yama, N.E.; Magana-Ortiz, D.; Oliva, A.I.; Ortiz-Vazquez, E. Antifungal activity of honey from stingless bee *Melipona beecheii* against *Candida albicans*. *Journal of Apicultural Research* **2020**, *59*, 12-18, doi:10.1080/00218839.2019.1665247.
  21. Anand, S.; Deighton, M.; Livanos, G.; Pang, E.C.K.; Mantri, N. Agastache honey has superior antifungal activity in comparison with important commercial honeys. *Sci Rep* **2019**, *9*, 14, doi:10.1038/s41598-019-54679-w.
  22. Irish, J.; Carter, D.A.; Shokohi, T.; Blair, S.E. Honey has an antifungal effect against *Candida* species. *Med. Mycol.* **2006**, *44*, 289-291, doi:10.1080/13693780500417037.
  23. Feas, X.; Estevinho, M.L. A Survey of the In Vitro Antifungal Activity of Heather (*Erica* Sp.) Organic Honey. *J. Med. Food* **2011**, *14*, 1284-1288, doi:10.1089/jmf.2010.0211.
  24. Ansari, M.J.; Al-Ghamdi, A.; Usmani, S.; Al-Waili, N.S.; Sharma, D.; Nuru, A.; Al-Attal, Y. Effect of Jujube Honey on *Candida albicans* Growth and Biofilm Formation. *Arch. Med. Res.* **2013**, *44*, 352-360, doi:10.1016/j.arcmed.2013.06.003.
  25. Erturk, O.; Karakas, F.P.; Pehlivan, D.; Nas, N. The Antibacterial and Antifungal Effects of *Rhododendron* Derived Mad Honey and Extracts of Four *Rhododendron* Species. *Turk. J. Biol.* **2009**, *33*, 151-158.
  26. Dryden, M.; Lockyer, G.; Saeed, K.; Cooke, J. Engineered honey: In vitro antimicrobial activity of a novel topical wound care treatment. *J. Glob. Antimicrob. Resist.* **2014**, *2*, 168-172, doi:10.1016/j.jgar.2014.03.006.
